# Supplementary material for: Pseudolycoriella hygida (Sauaia and Alves)—An Overview of a Model Organism in Genetics, with New Aspects in Morphology and Systematics
Source: MDPI journal article supplement (doi:10.3390/insects15020118), 2024-02-06
Supplement: s1 [file s1]

**Table S1.** Genetic distances (p-distances) based on COI barcodes from 14 outgroup representatives and 48 *Pseudolycorielliella* specimens in %. The taxa have been arranged alphabetically within the two groups. *Pseudolycorielliella hygida* specimens are marked in red.

[illegible]
